# Supplementary material for: Critical analysis of spectral solvent shifts calculated by the contemporary PCM approaches of a representative series of charge-transfer complexes between tetracyanoethylene and methylated benzenes
Source: Royal Society of Chemistry journal article supplement (doi:10.1039/c5cp01614b), 2015-01-01

## Critical analysis of spectral solvent shifts calculated by contemporary PCM approaches of a representative series of charge-transfer complexes between tetracyanoethylene (TCNE) and methylated benzenes (NMB)

Šimon Budzák,<sup>1</sup> Pavel Mach,<sup>2</sup> Miroslav Medved',<sup>1</sup> and Ondrej Kysel'<sup>1</sup>

<sup>1</sup>Department of Chemistry, Faculty of Natural Sciences, Matej Bel University, Tajovského 40, SK-97400 Banská Bystrica, Slovak Republic

<sup>2</sup>Department of nuclear physics and biophysics, Faculty of mathematics, physics and informatics, Comenius University, Mlynská dolina CH1, SK-84215 Bratislava, Slovak Republic

### Supporting information

SI Figure 1. Comparison of red solvent shifts calculated by different DFT functionals at different levels of PCM approximation.

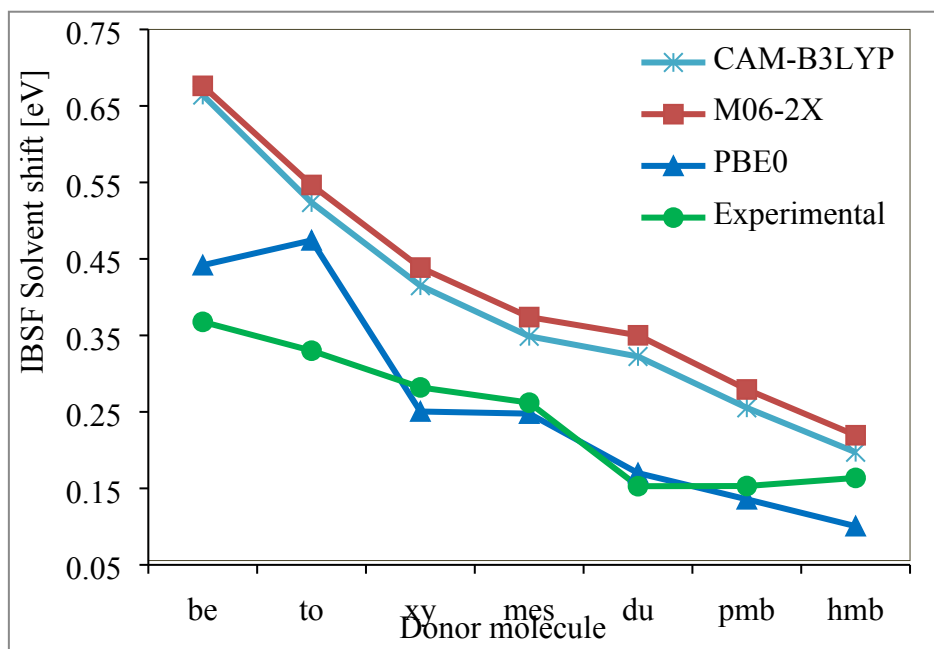

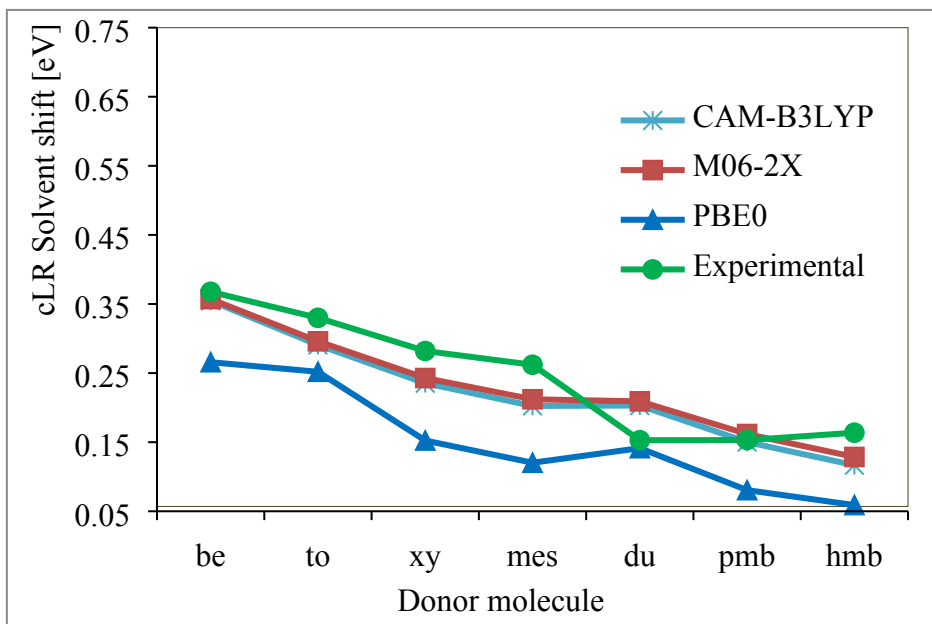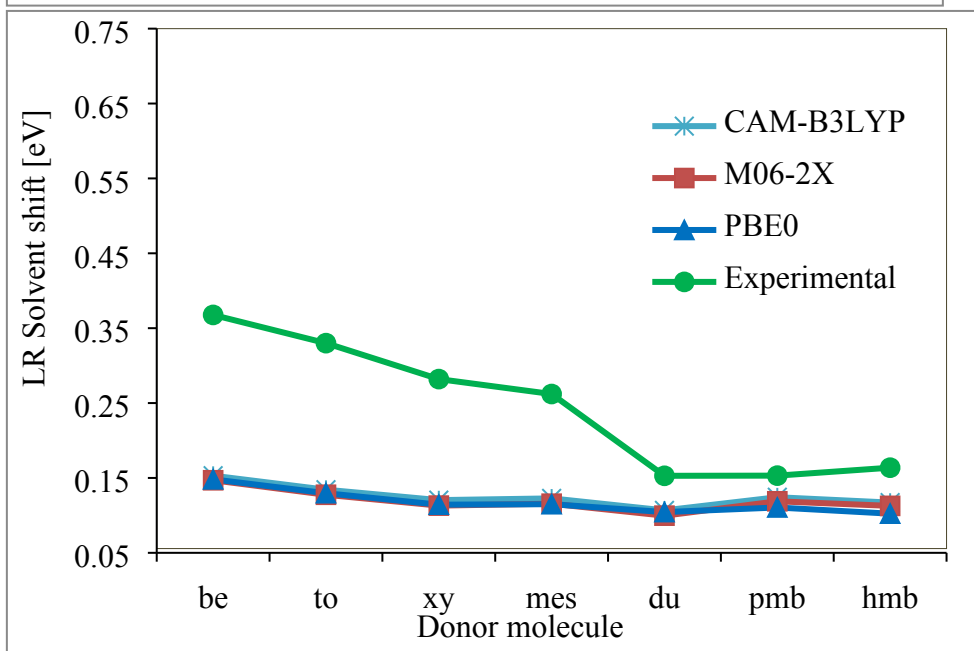

Supplement: c5cp01614b1.pdf [file c5cp01614b1.pdf]
